# Supplementary material for: The maternal drug exposure birth cohort (DEBC) in China
Source: Springer Nature journal article supplement (doi:10.1038/s41467-024-49623-0), 2024-06-21
Supplement: MOESM1 [file 41467_2024_49623_MOESM1_ESM.pdf]

# **The maternal drug exposure birth cohort (DEBC) in China** SUPPLEMENTARY INFORMATION

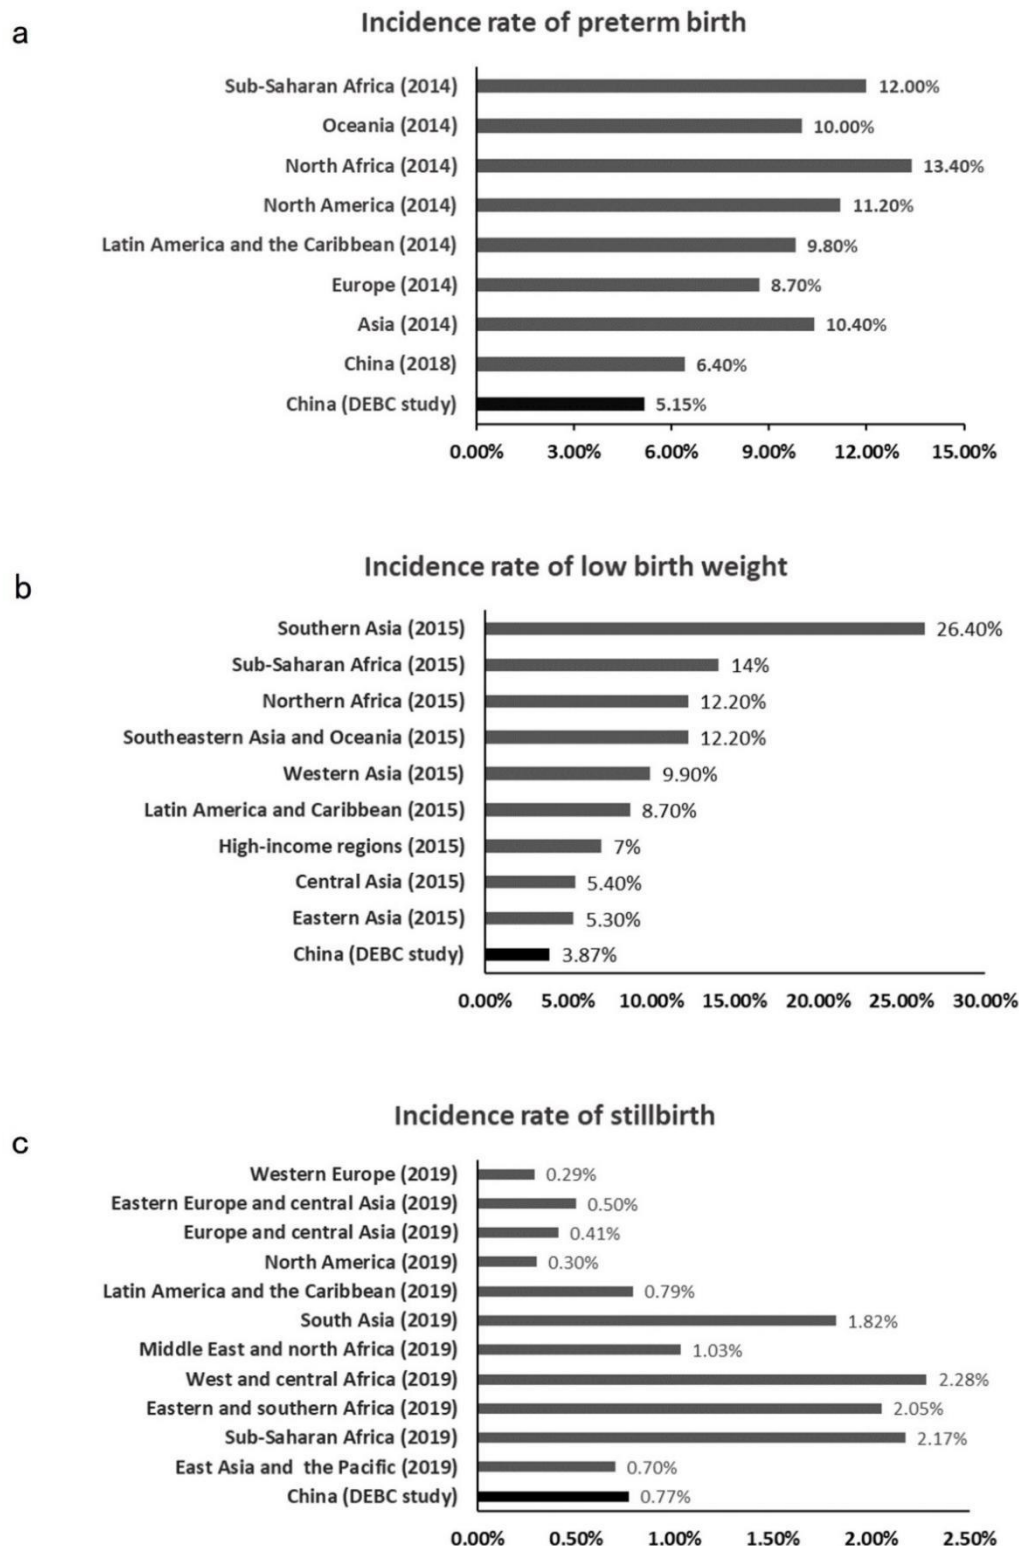

**Supplementary Figure 1 Comparison of the incidence rates of adverse birth outcomes observed in the DEBC study with other domestic Chinese investigations and global regions.**

a. The incidence rate comparison of preterm birth. b. The incidence rate comparison of low birth weight. c. The incidence rate comparison of stillbirth.

**Supplementary Table 1. Comparison of the demographic characteristics between pregnant women without adverse outcomes and with adverse pregnancy outcomes.**

| Baseline characteristics | Adverse pregnancy outcomes |       |       |       | Chi <sup>2</sup> |
|--------------------------|----------------------------|-------|-------|-------|------------------|
|                          | NO                         |       | YES   |       |                  |
|                          | N                          | %     | N     | %     |                  |
| Maternal age             |                            |       |       |       | 305.814***       |
| <20                      | 945                        | 0.97  | 171   | 1.12  |                  |
| 20-24                    | 13447                      | 13.76 | 1861  | 12.21 |                  |
| 25-29                    | 39451                      | 40.36 | 5485  | 35.99 |                  |
| 30-34                    | 31371                      | 32.09 | 5105  | 33.50 |                  |
| >=35                     | 10605                      | 10.85 | 2299  | 15.09 |                  |
| Missing                  | 1928                       | 1.97  | 318   | 2.09  |                  |
| Maternal education level |                            |       |       |       | 60.391***        |
| Primary school and below | 1137                       | 1.16  | 216   | 1.42  |                  |
| Junior high school       | 13062                      | 13.36 | 2343  | 15.38 |                  |
| High school              | 17802                      | 18.21 | 2752  | 18.06 |                  |
| College                  | 59728                      | 61.10 | 8948  | 58.72 |                  |
| Postgraduate and above   | 5788                       | 5.92  | 942   | 6.18  |                  |
| Missing                  | 230                        | 0.24  | 38    | 0.25  |                  |
| Fertilization way        |                            |       |       |       | 98.625***        |
| Natural conception       | 92479                      | 94.61 | 14118 | 92.64 |                  |
| Assisted reproduction    | 4930                       | 5.04  | 1063  | 6.98  |                  |

\*\*\*  $P < 0.05$ . The P values are two-sided.

**Supplementary Table 2. Comparison of the demographic characteristics between initial cohort and DEBC population.**

| <b>Baseline characteristics</b>   | <b>Initial cohort<br/>N(%)</b> | <b>DEBC population<br/>N(%)</b> | <b>Chi-square<br/>value</b> | <b><i>P</i>-value</b> |
|-----------------------------------|--------------------------------|---------------------------------|-----------------------------|-----------------------|
| <b>Maternal age</b>               |                                |                                 | 3.1374                      | 0.5351                |
| <20                               | 1575(1.07)                     | 1116(1.01)                      |                             |                       |
| 20-24                             | 20341(13.85)                   | 15308(13.82)                    |                             |                       |
| 25-29                             | 59625(40.6)                    | 44936(40.58)                    |                             |                       |
| 30-34                             | 48366(32.93)                   | 36476(32.94)                    |                             |                       |
| >=35                              | 16963(11.55)                   | 12904(11.65)                    |                             |                       |
| <b>Maternal education level</b>   |                                |                                 | 9.5909                      | 0.002                 |
| Junior high school and below      | 16758(14.87)                   | 22980(15.3)                     |                             |                       |
| High school and above             | 95960(85.13)                   | 127173(84.7)                    |                             |                       |
| <b>Planned pregnancy</b>          |                                |                                 | 2.7552                      | 0.0969                |
| Yes                               | 84380(58.89)                   | 66690(59.21)                    |                             |                       |
| No                                | 58910(41.11)                   | 45938(40.79)                    |                             |                       |
| <b>Folic acid supplementation</b> |                                |                                 | 3.7036                      | 0.0543                |
| No                                | 14644(10.32)                   | 11271(10.08)                    |                             |                       |
| Yes                               | 127317(89.68)                  | 100517(89.92)                   |                             |                       |

The P values are two-sided.

**Supplementary Table 3. Specimen collection in DEBC.**

| Time points                           | Specimen types<br>(Singleton pregnancy, twins or triplets) |                      |                     |          |
|---------------------------------------|------------------------------------------------------------|----------------------|---------------------|----------|
| First trimester (<14 weeks)           | Peripheral blood                                           | Urine                |                     |          |
| Second trimester (22-26 weeks)        | Peripheral blood                                           | Urine                |                     |          |
| Third trimester (32-36 weeks)         | Peripheral blood                                           | Urine                |                     |          |
| Pregnancy outcomes                    |                                                            |                      |                     |          |
| Miscarriage                           | Chorionic tissues                                          |                      |                     |          |
| Abortion ( < 20 weeks)                | Amniotic fluid                                             | Muscular tissues     | Pathological tissue |          |
| Abortion (≥20 weeks), Stillbirth      | Amniotic fluid                                             | Muscular tissues     | Pathological tissue | Placenta |
| Severe preterm delivery ( < 32 weeks) | Placenta                                                   | Umbilical cord blood |                     |          |
| Very low birth weight ( < 1500g)      | Placenta                                                   | Umbilical cord blood |                     |          |
| Birth defect                          | Placenta                                                   | Umbilical cord blood |                     |          |

**Supplementary Table 4. The procedures for the specimen collection, processing and storage.**

| Type                      | Specimen collection   | Specimen aliquot    |                               | Collection and pre-treatment                                                                                 | Long-term storage condition    |
|---------------------------|-----------------------|---------------------|-------------------------------|--------------------------------------------------------------------------------------------------------------|--------------------------------|
|                           |                       | Type                | Number                        |                                                                                                              |                                |
| Maternal peripheral blood | Blood (EDTA) 3-4ml    | Plasma              | 0.5ml×4                       | centrifuging 10min at 4℃, 3500rpm                                                                            | -80℃ for years                 |
|                           |                       | Buffy coat          | 0.5ml×4                       |                                                                                                              |                                |
|                           | Blood (Plain) 3-4ml   | Serum               | 0.5ml×4                       | Standing for 2 hours, then centrifuging 10min at 4℃, 3500rpm                                                 |                                |
| Maternal urine            | Urine 20ml            | Urine               | 1ml×4                         | Not urina sanguinis                                                                                          | -80℃ for years                 |
| Umbilical cord blood      | Blood (EDTA) 3-4ml    | Plasma              | 0.5ml×4                       | Centrifuging 10min at 4℃, 3500rpm                                                                            | -80℃ for years                 |
|                           |                       | Buffy coat          | 0.5ml×4                       |                                                                                                              |                                |
|                           | Blood (Plain) 3-4ml   | Serum               | 0.5ml×4                       | Standing for 2 hours, then centrifuging 10min at 4℃, 3500rpm                                                 |                                |
| Amniotic fluid            | Amniotic fluid 8-10ml | Supernatant         | 0.5ml×4                       | Centrifuging 10min at 4℃, 1500rpm, and sampling 0.5ml for 4 tubes                                            | -80℃ for years                 |
|                           |                       | Amniocyte           | 0.5ml×2                       | Remove excess supernatant, sampling amniocyte 0.5ml for 2 tubes                                              |                                |
| Tissues                   | Placenta              | Maternal surface    | 1.0×1.0×0.5cm <sup>3</sup> ×4 | On the maternal side, scissoring for 1.0×1.0×0.5cm(length, width, and height) of placenta within 4 quadrants | Liquid nitrogen/-80℃ for years |
|                           |                       | Fetal surface       | 1.0×1.0×0.5cm <sup>3</sup> ×4 | On the fetal side, scissoring for 1.0×1.0×0.5cm(length, width, and height) of placenta within 4 quadrants    |                                |
|                           | Muscular tissues      | Limb muscles        | 2g×4                          | Scissoring for 2g muscles of left upper, left lower, right upper, right lower limbs, respectively            |                                |
|                           | Birth defect part     | Pathological tissue | 4-8 pieces                    | Scissoring for 4-8 pieces in the birth defect part, successively                                             |                                |

**Supplementary Table 5. Statistical standard of birth defect**

| <b>Birth defect</b>                     | <b>Statistical standard</b>                                                                                                                                                                          |
|-----------------------------------------|------------------------------------------------------------------------------------------------------------------------------------------------------------------------------------------------------|
| Anencephaly                             | Anencephaly with spina bifida, with encephalocele, or with hydrocephalus was counted only as anencephaly. Cephalic malformation and hydranencephaly were excluded.                                   |
| Spina bifida                            | Spina bifida with hydrocephalus or spina bifida with encephalocele is only counted as spina bifidus. Spina bifida with anencephaly, spina bifida occulta, and sacrococcygeal teratoma were excluded. |
| Encephalocele                           | Encephalocele with spina bifida was excluded.                                                                                                                                                        |
| Congenital hydrocephalus                | Hydrocephalus with anencephaly, hydrocephalus with encephalocele, hydrocephalus with encephalocele, and spina bifida should be excluded from congenital hydrocephalus, including hydroanencephaly    |
| Cleft palate                            | Cleft lip with cleft palate, functional short palate, high and narrow palate and simple cleft palate were excluded.                                                                                  |
| Cleft lip                               | Cleft lip with cleft palate and median cleft lip were excluded.                                                                                                                                      |
| Cleft lip with cleft palate             | Simple cleft lip and cleft palate were excluded.                                                                                                                                                     |
| Microtia/Auricularia                    | Atresia of external auditory canal, dysplasia of auditory canal and low ear with small auricle but normal appearance were excluded.                                                                  |
| Other malformations of the external ear | Auricular deformities other than microtia, absence of ears, and/or morphological abnormalities were excluded.                                                                                        |
| Esophageal atresia or stenosis          | Simple esophagotracheal fistula, esophageal ring or web, and tracheoesophageal fistula were included.                                                                                                |
| Anorectal atresia or stenosis           | Ectopic anus, and mild stenosis that did not require surgical correction were excluded.                                                                                                              |
| Hypospadias                             | Epispadias, penile curvature with a normal urethral opening, phimosis, and pseudohermaphroditism were excluded.                                                                                      |
| Bladder exstrophy                       | No special criteria.                                                                                                                                                                                 |
| Talipes equinovarus                     | Neonatal talipes varus, multiple joint contracture, spinal deformity, spina bifida, paralytic talipes equinovarus complicated by encephalocele, equinovarus caused by peripheral nerve injury were   |

---

|                                 |                                                                                                                                                                                                  |
|---------------------------------|--------------------------------------------------------------------------------------------------------------------------------------------------------------------------------------------------|
| Polydactyly                     | excluded.<br>A split nail with a bifurcated deformity of the fingertip was excluded.                                                                                                             |
| Syndactyly                      | No special criteria.                                                                                                                                                                             |
| Limb shortening                 | Missing fingers (toes) and split hands (split feet) were included; patients with brachydactyly, mild shortening with normal bone structure and shape, syndactyly, and syndesmosis were excluded. |
| Congenital diaphragmatic hernia | Complete absence of the diaphragm was included; hiatal hernia was excluded.                                                                                                                      |
| Omphalocele                     | Umbilical hernia, gastroschisis and hypoplasia of abdominal wall muscle were excluded.                                                                                                           |
| Gastroschisis                   | Omphalocele and umbilical hernia were excluded.                                                                                                                                                  |
| Conjoined twins                 | No special criteria.                                                                                                                                                                             |
| Down's syndrome                 | No special criteria.                                                                                                                                                                             |
| Congenital heart disease        | Atrial septal defect, ventricular septal defect, transposition of the great vessels, tetralogy of fallot, pulmonary stricture, patent ductus arteriosus, cardiac ectopic, etc, were included.    |

---

**Supplementary Table 6. ICD10 Codes for Major Birth Defects**

| <b>Name of deformity</b>                                      | <b>ICD-10 code</b>   |
|---------------------------------------------------------------|----------------------|
| <b>Congenital malformation of nervous system</b>              |                      |
| Anencephaly                                                   | Q00                  |
| Encephalocele                                                 | Q01                  |
| Microcephaly                                                  | Q02                  |
| Congenital hydrocephalus                                      | Q03                  |
| Spina bifida                                                  | Q05                  |
| <b>Congenital malformation of eye, ear, face and neck</b>     |                      |
| Congenital cataract                                           | Q12.0                |
| Anophthalmia, microphthalmia, and macrophthalmia              | Q11                  |
| Congenital absence of auricle                                 | Q16.0                |
| Small ears                                                    | Q17.2                |
| Secondary Ear                                                 | Q17.0                |
| <b>Congenital malformation of the circulatory system</b>      |                      |
| Ventricular septal defect                                     | Q21.0                |
| Atrial Septal Defect                                          | Q21.1                |
| Tetralogy of Fallot                                           | Q21.3                |
| Hypoplastic left heart syndrome                               | Q23.4                |
| Patent ductus arteriosus                                      | Q25.0                |
| Transposition great vessels                                   | Q20.3                |
| Pulmonary stenosis                                            | Q25.6                |
| <b>Cleft lip and palate</b>                                   |                      |
| Cleft palate                                                  | Q35                  |
| Cleft lip                                                     | Q36                  |
| Cleft palate with cleft lip                                   | Q37                  |
| <b>Other congenital malformations of the digestive system</b> |                      |
| Esophageal stricture or atresia                               | Q39.0, Q39.1, Q39.2, |



| <b>Name of deformity</b>                                               | <b>ICD-10 code</b>            |
|------------------------------------------------------------------------|-------------------------------|
|                                                                        | Q39.3                         |
| Anorectal atresia or stenosis                                          | Q42.0, Q42.1, Q42.2,<br>Q42.3 |
| <b>Congenital malformation of reproductive organ</b>                   |                               |
| Undescended testicles                                                  | Q53                           |
| Hypospadias                                                            | Q54                           |
| Ambiguity and pseudohermaphroditism<br>(hermaphroditism)               | Q56                           |
| <b>Other congenital malformations of the urinary system</b>            |                               |
| Bladder exstrophy                                                      | Q64.1                         |
| <b>Congenital malformation and deformity of musculoskeletal system</b> |                               |
| Talipes equinovarus                                                    | Q66.0                         |
| Polydactyly                                                            | Q69                           |
| Syndactyly                                                             | Q70                           |
| Upper limb deficiency                                                  | Q71                           |
| Lower limb shortage defect                                             | Q72                           |
| Congenital diaphragmatic hernia                                        | Q79.0                         |
| Congenital omphalocele                                                 | Q79.2                         |
| Gastroschisis                                                          | Q79.3                         |
| <b>Other congenital malformations</b>                                  |                               |
| Conjoined twins                                                        | Q89.4                         |
| <b>Chromosomal abnormalities</b>                                       |                               |
| Down's syndrome                                                        | Q90                           |
| Trisomy 18 syndrome                                                    | Q91                           |
| <b>Hemangioma and lymphangioma</b>                                     | D18                           |
| <b>Thalassemia</b>                                                     | D56                           |
| <b>Other congenital anomalies</b>                                      |                               |

| <b>Name of deformity</b>   | <b>ICD-10 code</b> |
|----------------------------|--------------------|
| Inguinal hernia            | K40                |
| Umbilical hernia           | K42                |
| Teratoma                   | D48.9              |
| Congenital phenylketonuria | E70.0              |
| Congenital hypothyroidism  | E03                |

### **Supplementary References**

Annual Report-INTERNATIONAL CLEARINGHOUSE FOR BIRTH DEFECTS  
SURVEILLANCE AND RESEARCH (ICBDSR)

<http://www.icbdsr.org/resources/annual-report/>
